# Supplementary material
Source: publisher site journal article supplement (https://mycokeys.pensoft.net/article/25678/download/suppl/33/)
Supplement: Supplementary file 1

Specimen_ID	Lmin	L05	Lmean	L95	Lmax	Wmin	W05	Wmean	W95	Wmax	Qmin	Q05	Qmean	Q95	Qmax	Spore_count
FO_13761	6.43	6.62	7.35	8.14	8.26	2.15	2.38	2.58	2.83	2.91	2.46	2.58	2.86	3.23	3.57	59
FO_14338	7.85	8.18	9.18	9.87	10.09	4.51	4.75	5.25	5.72	5.81	1.56	1.59	1.75	1.93	1.98	26
FR_W213_3_I	6.99	7.59	10.74	12.39	13.04	2.40	2.44	2.72	3.12	3.23	2.65	2.75	3.96	4.64	5.03	25
Hjm_16400	5.28	5.95	6.70	8.46	8.57	1.99	2.16	2.39	2.56	2.63	2.10	2.40	2.81	3.49	3.69	40
Hjm_16573	7.12	7.35	8.35	9.20	9.90	2.16	2.22	2.43	2.61	2.70	2.83	3.01	3.44	3.87	4.05	28
KAS_GEL_3520	6.60	6.66	7.66	8.65	8.81	2.17	2.35	2.58	2.78	2.83	2.47	2.53	2.97	3.40	3.54	30
KAS_GEL_5032	5.24	5.38	5.86	6.64	6.78	2.27	2.32	2.51	2.67	2.80	2.04	2.06	2.34	2.60	2.78	22
KAS_L_0134	7.05	7.65	8.58	9.63	10.03	2.41	2.55	2.76	2.95	3.03	2.70	2.79	3.11	3.47	3.59	56
KAS_L_0140	4.30	4.91	5.49	6.08	6.49	2.00	2.19	2.46	2.76	2.93	1.87	1.93	2.24	2.55	3.13	72
KAS_L_0244	5.35	5.85	7.17	8.34	8.69	2.22	2.48	2.80	3.16	3.29	2.06	2.16	2.57	2.90	3.42	80
KAS_L_1147	7.79	7.93	8.50	9.20	9.44	2.67	2.68	2.89	3.09	3.12	2.66	2.70	2.95	3.22	3.22	7
KAS_L_1226	4.72	4.81	5.42	6.01	6.08	1.76	2.17	2.40	2.60	2.88	1.83	1.91	2.27	2.55	3.00	30
KAS_L_1296	6.38	6.85	7.46	8.11	8.61	3.69	3.88	4.21	4.61	4.74	1.52	1.59	1.78	1.96	2.07	78
KAS_L_1498	8.96	9.33	10.76	12.22	12.74	2.38	2.49	2.76	3.11	3.11	3.25	3.28	3.91	4.47	4.62	32
KAS_L_1584a	5.78	5.93	6.62	7.22	7.32	2.76	2.85	3.11	3.38	3.45	1.85	1.93	2.13	2.42	2.48	72
KAS_L_1584b	7.05	7.35	8.48	9.40	9.72	2.39	2.51	2.75	3.03	3.15	2.33	2.74	3.09	3.50	3.74	78
KAS_L_1726	4.50	5.32	6.14	6.71	7.01	2.30	2.42	2.64	2.82	2.88	1.71	2.08	2.33	2.56	2.57	41
KAS_L_1795	7.34	8.56	9.39	10.16	10.22	2.17	2.18	2.40	2.67	2.70	3.05	3.41	3.93	4.38	4.52	33
KAS_L_1860	7.35	7.58	8.77	10.52	10.77	3.73	4.01	4.44	4.95	5.17	1.65	1.73	1.98	2.27	2.44	43
KHL_10039	8.40	9.35	10.21	11.28	11.70	2.70	2.80	2.96	3.10	3.10	2.80	3.19	3.45	3.84	4.03	30
KHL_10272	9.08	9.58	10.16	10.84	11.07	2.76	2.81	3.07	3.23	3.29	3.05	3.07	3.32	3.65	3.70	31
KHL_10360	9.65	10.67	11.47	12.32	12.73	2.52	2.76	3.16	3.50	3.68	2.99	3.16	3.65	4.24	4.46	51
KHL_10397	6.68	7.47	8.22	8.94	9.37	2.40	2.50	2.76	3.00	3.03	2.52	2.74	2.99	3.34	3.38	30
KHL_10406	7.11	7.85	9.55	10.73	11.15	2.20	2.24	2.45	2.67	2.68	3.00	3.37	3.90	4.46	4.72	32
KHL_10411	6.01	6.65	7.87	8.86	9.01	2.27	2.28	2.43	2.69	2.80	2.45	2.62	3.24	3.52	3.85	37
KHL_10444	7.23	8.12	9.54	10.86	11.04	2.48	2.67	2.97	3.30	3.50	2.39	2.67	3.22	3.75	4.08	97
KHL_10566	8.18	8.22	8.83	9.49	9.84	2.30	2.39	2.61	2.91	2.93	3.03	3.03	3.40	3.80	3.90	15
KHL_10622	10.89	11.12	12.35	13.52	14.18	2.91	3.08	3.37	3.76	3.84	3.29	3.34	3.67	3.93	4.12	32
KHL_10733	6.30	6.72	7.28	7.80	8.00	2.00	2.00	2.26	2.57	2.65	2.54	2.55	3.25	3.75	3.75	22
KHL_10763	6.07	6.84	8.06	9.52	10.15	2.11	2.16	2.48	2.68	2.75	2.53	2.76	3.26	3.72	3.85	39
KHL_10780	8.10	8.50	9.28	10.00	10.30	2.60	2.65	2.84	3.00	3.10	2.79	2.97	3.28	3.48	3.69	31
KHL_10813	8.11	8.43	9.48	10.74	11.09	2.45	2.75	3.15	3.54	3.68	2.42	2.53	3.02	3.41	3.79	105
KHL_11042	8.28	8.38	9.83	11.12	11.62	3.77	3.99	4.64	5.28	5.46	1.83	1.90	2.12	2.34	2.36	30
KHL_11216	7.94	8.16	9.02	10.00	10.65	1.97	2.02	2.19	2.38	2.45	3.59	3.64	4.13	4.68	4.84	39
KHL_11355	5.83	6.39	7.04	7.57	7.98	2.26	2.27	2.51	2.81	2.90	2.44	2.45	2.81	3.22	3.24	36
KHL_11365	5.65	5.95	6.92	7.86	8.13	2.09	2.20	2.56	2.83	3.05	2.22	2.35	2.71	3.08	3.48	101
KHL_11566	8.63	8.77	9.91	11.24	11.56	3.96	4.28	4.59	4.97	5.25	1.92	2.01	2.16	2.49	2.56	39
KHL_12761	9.81	10.61	11.69	12.74	12.86	2.09	2.23	2.73	3.12	3.50	3.41	3.56	4.33	5.25	5.87	37
KHL_12830	5.65	5.83	6.51	7.22	7.94	2.63	2.74	3.01	3.29	3.38	1.83	1.97	2.17	2.37	2.47	44
KHL_14537	6.51	6.88	7.88	9.06	9.27	2.15	2.24	2.44	2.69	2.73	2.58	2.87	3.23	3.60	3.72	47
KHL_15318	5.82	6.15	7.19	8.14	8.41	1.84	2.03	2.46	2.71	2.82	2.28	2.52	2.93	3.38	3.67	38
KHL_15322	5.22	5.84	7.08	8.46	8.86	2.40	2.46	2.69	2.94	3.16	1.93	2.17	2.64	3.05	3.41	32
KHL_15325	5.85	5.86	6.86	7.72	7.87	2.23	2.28	2.50	2.67	2.79	2.10	2.29	2.75	3.10	3.17	28
KHL_15327	5.99	6.37	7.10	7.86	7.90	2.20	2.33	2.52	2.74	2.88	2.42	2.52	2.82	3.15	3.20	26
KHL_15352	6.82	6.96	7.92	8.96	9.67	2.03	2.09	2.33	2.60	2.66	2.91	3.12	3.40	3.77	3.85	38
KHL_16100	6.41	6.81	8.05	9.37	9.41	1.89	2.07	2.31	2.62	2.78	2.97	3.10	3.50	3.87	4.24	58
KHL_9093	10.89	11.08	12.19	13.11	13.34	2.43	2.59	2.87	3.24	3.67	3.57	3.71	4.27	4.71	4.89	39
KHL_9544	6.78	6.97	7.95	8.78	9.35	2.17	2.20	2.45	2.78	2.80	2.70	2.80	3.26	3.68	3.99	44
KHL_9561	6.98	7.28	8.44	9.18	9.24	2.66	2.78	2.99	3.23	3.25	2.29	2.33	2.83	3.12	3.47	42
LR_15736	5.54	5.72	6.35	7.01	7.14	2.43	2.47	2.70	2.89	2.95	2.07	2.15	2.36	2.66	2.84	35
LR_19581	6.15	6.30	7.27	8.16	8.40	2.23	2.28	2.44	2.60	2.63	2.47	2.57	2.98	3.43	3.56	31
LR_24170	6.24	6.64	7.44	8.16	8.24	1.97	2.08	2.27	2.44	2.48	2.68	2.86	3.28	3.60	3.64	36
LY_11247	6.30	6.70	7.37	7.97	8.38	2.94	3.06	3.32	3.54	3.57	1.95	2.03	2.22	2.44	2.53	49
LY_11378	6.09	6.25	7.11	7.99	8.44	2.02	2.08	2.33	2.54	2.60	2.41	2.61	3.06	3.40	3.51	36
LY_12293	6.68	7.83	9.50	11.05	11.88	2.27	2.43	2.68	2.92	3.22	2.76	2.94	3.55	4.18	4.47	60
LY_12750	5.09	5.12	5.67	6.12	6.45	2.32	2.33	2.65	2.89	2.98	1.83	1.88	2.15	2.45	2.48	27
LY_12772	7.62	7.97	9.67	11.08	11.48	2.27	2.36	2.61	2.92	3.01	2.88	3.04	3.71	4.32	4.56	34
LY_12816	5.98	6.19	7.29	8.45	8.93	2.30	2.33	2.52	2.71	2.78	2.38	2.48	2.89	3.36	3.75	33
O_506781	10.00	10.64	12.70	14.53	15.33	3.16	3.25	3.63	3.91	4.18	2.91	3.03	3.50	3.98	4.02	48
O_506782	6.23	6.60	7.68	8.66	9.55	2.02	2.16	2.33	2.50	2.70	2.69	2.86	3.30	3.70	3.93	45
O_909583	8.46	8.66	9.82	11.17	11.55	3.51	3.54	3.80	4.20	4.35	2.28	2.43	2.59	2.98	3.21	31
O_918488	7.54	8.00	9.24	10.48	10.76	2.77	2.91	3.30	3.73	3.79	2.15	2.47	2.81	3.17	3.66	72
O_918493	8.36	8.55	9.26	9.94	10.11	2.37	2.40	2.55	2.71	2.73	3.06	3.22	3.64	4.01	4.21	40
O_918846	6.58	6.69	7.43	8.12	8.35	2.27	2.40	2.53	2.67	2.90	2.44	2.62	2.94	3.30	3.68	30
PDD_13816	6.80	6.95	7.52	8.59	9.00	3.30	3.30	3.73	4.06	4.40	1.68	1.75	2.02	2.25	2.42	30
TU_110894	8.93	9.45	10.56	11.57	11.80	1.93	2.07	2.35	2.60	2.71	3.85	3.89	4.52	5.49	5.69	38
TU_110895	7.87	8.27	9.39	10.68	11.51	2.03	2.16	2.41	2.62	2.77	3.36	3.44	3.90	4.39	4.84	43
